# Supplementary material
Source: Springer Nature journal article supplement (https://www.springermedizin.de/resource/supplementary/12935_2009_270_MOESM1_ESM.pdf/9540188)

070417.002

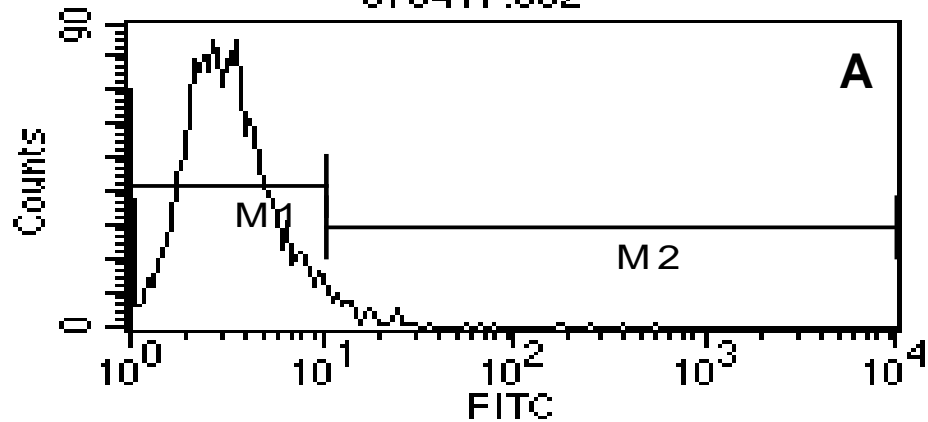

070417.003

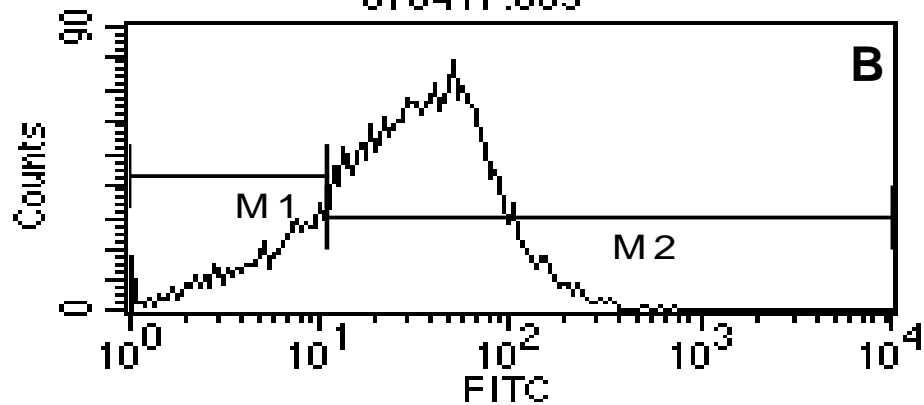

Supplement: MOESM1 [file 9540188]
